# Supplementary material for: Longitudinal associations of active commuting with wellbeing and sickness absence
Source: PubMed Central journal article supplement (PMC4766368; doi:10.1016/j.ypmed.2015.12.010), 2016-03
Supplement: mmc1.pdf [file mmc1.pdf]

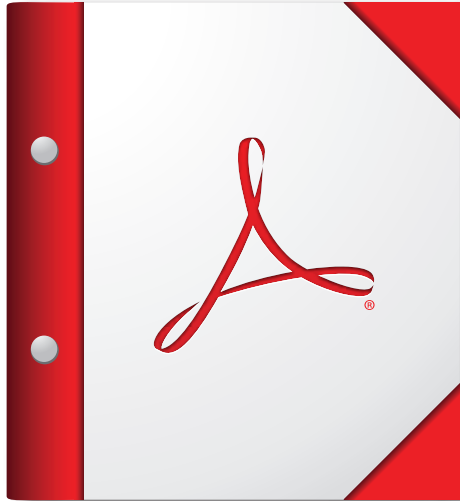

**For the best experience, open this PDF portfolio in  
Acrobat 9 or Adobe Reader 9, or later.**

[Get Adobe Reader Now!](#)
