# Supplementary material for: Longitudinal associations of active commuting with wellbeing and sickness absence
Source: PubMed Central journal article supplement (PMC4766368; doi:10.1016/j.ypmed.2015.12.010), 2016-03
Supplement: mmc3.pdf [file mmc3.pdf]

---

# Your Health

– *and* –

# Well-Being

This survey asks for your views about your health. This information will help keep track of how you feel and how well you are able to do your usual activities.

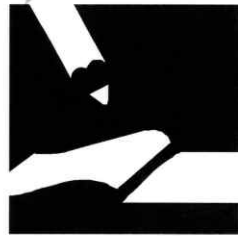

***Thank you for completing these questions!***

1. Overall, how would you rate your health during the past 4 weeks?  
 [Mark with a  in the one box that best describes your answer.]

|                            |                            |                            |                            |                            |                            |
|----------------------------|----------------------------|----------------------------|----------------------------|----------------------------|----------------------------|
| Excellent                  | Very good                  | Good                       | Fair                       | Poor                       | Very poor                  |
| τ                          | τ                          | τ                          | τ                          | τ                          | τ                          |
| <input type="checkbox"/> 1 | <input type="checkbox"/> 2 | <input type="checkbox"/> 3 | <input type="checkbox"/> 4 | <input type="checkbox"/> 5 | <input type="checkbox"/> 6 |

2. During the past 4 weeks, how much did physical health problems limit your usual physical activities (walking, climbing stairs)?

|                            |                            |                            |                            |                                  |
|----------------------------|----------------------------|----------------------------|----------------------------|----------------------------------|
| Not at all                 | Very little                | Somewhat                   | Quite a lot                | Could not do physical activities |
| τ                          | τ                          | τ                          | τ                          | τ                                |
| <input type="checkbox"/> 1 | <input type="checkbox"/> 2 | <input type="checkbox"/> 3 | <input type="checkbox"/> 4 | <input type="checkbox"/> 5       |

3. During the past 4 weeks, how much difficulty did you have doing your daily work, both inside and outside the home, because of your physical health?

|                            |                            |                            |                            |                            |
|----------------------------|----------------------------|----------------------------|----------------------------|----------------------------|
| None at all                | A little bit               | Some                       | Quite a lot                | Could not do daily work    |
| τ                          | τ                          | τ                          | τ                          | τ                          |
| <input type="checkbox"/> 1 | <input type="checkbox"/> 2 | <input type="checkbox"/> 3 | <input type="checkbox"/> 4 | <input type="checkbox"/> 5 |

4. How much **bodily** pain have you had during the **past 4 weeks**?

|                            |                            |                            |                            |                            |                            |
|----------------------------|----------------------------|----------------------------|----------------------------|----------------------------|----------------------------|
| None                       | Very mild                  | Mild                       | Moderate                   | Severe                     | Very severe                |
| τ                          | τ                          | τ                          | τ                          | τ                          | τ                          |
| <input type="checkbox"/> 1 | <input type="checkbox"/> 2 | <input type="checkbox"/> 3 | <input type="checkbox"/> 4 | <input type="checkbox"/> 5 | <input type="checkbox"/> 6 |

5. During the **past 4 weeks**, how much energy did you have?

|                            |                            |                            |                            |                            |
|----------------------------|----------------------------|----------------------------|----------------------------|----------------------------|
| Very much                  | Quite a bit                | Some                       | A little                   | None                       |
| τ                          | τ                          | τ                          | τ                          | τ                          |
| <input type="checkbox"/> 1 | <input type="checkbox"/> 2 | <input type="checkbox"/> 3 | <input type="checkbox"/> 4 | <input type="checkbox"/> 5 |

6. During the **past 4 weeks**, how much did your physical health or emotional problems limit your usual social activities with family or friends?

|                            |                            |                            |                            |                                |
|----------------------------|----------------------------|----------------------------|----------------------------|--------------------------------|
| Not at all                 | Very little                | Somewhat                   | Quite a lot                | Could not do social activities |
| τ                          | τ                          | τ                          | τ                          | τ                              |
| <input type="checkbox"/> 1 | <input type="checkbox"/> 2 | <input type="checkbox"/> 3 | <input type="checkbox"/> 4 | <input type="checkbox"/> 5     |

7. During the past 4 weeks, how much have you been bothered by emotional problems (such as feeling anxious, depressed or irritable)?

|                            |                            |                            |                            |                            |
|----------------------------|----------------------------|----------------------------|----------------------------|----------------------------|
| Not at all                 | Slightly                   | Moderately                 | Quite a lot                | Extremely                  |
| $\tau$                     | $\tau$                     | $\tau$                     | $\tau$                     | $\tau$                     |
| <input type="checkbox"/> 1 | <input type="checkbox"/> 2 | <input type="checkbox"/> 3 | <input type="checkbox"/> 4 | <input type="checkbox"/> 5 |

8. During the past 4 weeks, how much did personal or emotional problems keep you from doing your usual work, studies, or other daily activities?

|                            |                            |                            |                            |                               |
|----------------------------|----------------------------|----------------------------|----------------------------|-------------------------------|
| Not at all                 | Very little                | Somewhat                   | Quite a lot                | Could not do daily activities |
| $\tau$                     | $\tau$                     | $\tau$                     | $\tau$                     | $\tau$                        |
| <input type="checkbox"/> 1 | <input type="checkbox"/> 2 | <input type="checkbox"/> 3 | <input type="checkbox"/> 4 | <input type="checkbox"/> 5    |

***Thank you for completing these questions!***
